# Supplementary material for: Extracellular vesicles derived from astrocyte-treated with haFGF14-154 attenuate Alzheimer phenotype in AD mice
Source: Theranostics. 2022 May 9;12(8):3862–81. doi: 10.7150/thno.70951 (PMC9131260; doi:10.7150/thno.70951)

**Extracellular vesicles derived from astrocyte-treated with haFGF<sub>14-154</sub> attenuate  
Alzheimer phenotype in AD mice**

Dong Peng<sup>a,b</sup>, Youjin Wang<sup>a,b</sup>, Yuanjie Xiao<sup>a,b</sup>, Mengyuan Peng<sup>a,b</sup>, Wanwen Mai<sup>a,b</sup>, Bo  
Hu<sup>d</sup>, Yanbin Jia<sup>e</sup>, Hongxia Chen<sup>a,b,c</sup>, Yan Yang<sup>a,b,c</sup>, Qi Xiang<sup>a,b,c</sup>, Zhijian Su<sup>a,b,c</sup>, Qihao  
Zhang<sup>a,b,c\*</sup>, Yadong Huang<sup>a,b,c\*</sup>

\* Correspondence: Qihao Zhang, Department of Cell Biology & Institute of Biomedicine, College of Life Science and Technology, Jinan University, Guangzhou 510632, China. E-mail: tqhzhang@jnu.edu.cn. Yadong Huang, Cell Biology Department & Institute of Biomedicine, College of Life Science and Technology, Jinan University, Guangzhou 510632, China. E-mail: tydhuang@jnu.edu.cn

## Supplemental Figure legends

**Figure S1 Isolation and characterize of AEVs.** (A) A representative immunofluorescence staining with the antibody of glial fibrillary acidic protein (GFAP, Green, Scale: 50  $\mu$ m). (B) A schematic diagram displayed the treatment for astrocytes with A $\beta$ <sub>1-42</sub> and haFGF<sub>14-154</sub>. (C-E) Representative immunoblots (C) and quantification (D-E) of exosome biomarker proteins (CD9, CD63, and clathrin) in astrocytes and AEVs lysates, n = 4. Representative Endoplasmic reticulum biomarker calnexin used as negative control. (F) Representative particle size and distribution of AEVs observed by NanoSight Tracking Analysis (NTA). (G) Representative Atomic force microscopy (AFM) image of AEVs. \* $p < 0.05$ , \*\* $p < 0.01$ .  $P$  values are calculated by one-way ANOVA with Tukey's post-hoc test.

**Figure S2 Tracking AEVs labeled by PKH26.** (A) Representative images of AEVs labeled by PKH26 (red) in primary cortical neurons stained by green as MAP2<sup>+</sup> cells (Scale bars: 20  $\mu$ m). Neurons and AEVs were co-cultured for 0.5 h. (B) The schematic diagram of intranasal administration of AEVs (60  $\mu$ g) labeled by PKH26 (red). (C) The distribution of AEVs was detected in olfactory bulb (OB) and entorhinal cortex (EC) of APP/PS1 mice in 6 h after single intranasal administration. The negative control mice were given volume-matched PBS.

**Figure S3 Supplementary data for APP/PS1 mice in Y-maze and MWM test.** In Y-maze test, total arm entries (A), total traveled distance (B), the correlation between total arm entries and spontaneous alternation (C), the correlation between total traveled distance and spontaneous alternation (D) in APP/PS1 mice, n = 6-8. (E) The movement distance of escape latency for APP/PS1 mice in MWM test, n = 8. \* $p < 0.05$ , \*\* $p < 0.01$ .  $P$  values are calculated by two-way ANOVA with Tukey's post-hoc test.

**Figure S4 AEVs- $A\beta$ +H ameliorate learning and memory deficits in AD mice with brain injection of  $A\beta_{1-42}$ .** (A) Experimental protocols of intranasal administration and behavior test of AD mice with hippocampal injection of  $A\beta_{1-42}$ . (B) Spontaneous alternation in Y-maze,  $n = 8-10$ . (C-F) In Y-maze test, total arm entries (C), total traveled distance (D), the correlation between total arm entries and spontaneous alternation (E), the correlation between total traveled distance and spontaneous alternation (F) in AD mice with  $A\beta$  brain injection,  $n = 8-10$ . (G-I) Navigation test in MWM,  $n = 7/8$ . Representative movement tracks of escape latency on day 5 in navigation test (G) and the escape latency (H, I). (J) The movement distance of escape latency for AD mice with  $A\beta$  brain injection in MWM test,  $n = 7/8$ . (K-M) Spatial probe test was performed 24 h after the navigation test. Representative movement tracks in spatial probe test (K), numbers of crossing the removed platform area (L) and time spend in target quadrant (M) in spatial probe test of MWM,  $n = 7/8$ .  $*p < 0.05$ ,  $**p < 0.01$ ,  $***p < 0.001$ .  $P$  values are calculated by two-way ANOVA with Tukey's post-hoc test.

**Figure S5 AEVs- $A\beta$ +H enhance expression of synaptic proteins in AD mice with brain injection of  $A\beta_{1-42}$ .** (A, E) Representative immunoblotting images of PSD95, GAP43 and SYN in the PFC (A) and hippocampus (E) of AD mice. The quantified expression of the above proteins in the PFC (B-D) and hippocampus (F-H),  $n = 5-6$ . Data are mean  $\pm$  SEM.  $**p < 0.01$ ,  $***p < 0.001$ .  $P$  values are calculated by one-way ANOVA with Tukey's post-hoc test.

**Figure S6 AEVs- $A\beta$ +H reduce  $A\beta$  deposition in AD mice with brain injection of  $A\beta_{1-42}$ .** (A)  $A\beta$  plaque in the hippocampal DG, CA1 and CA3 regions of AD mice detected by immunochemistry. (B-D) The area of  $A\beta$  plaque analyzed by image-pro plus software,  $n = 4-6$ . (E-G) The level of  $A\beta$  in the PFC and hippocampus detected

by Western blot,  $n = 4-6$ . Data are mean  $\pm$  SEM.  $*p < 0.05$ ,  $**p < 0.01$ .  $P$  values are calculated by one-way ANOVA with Tukey's post-hoc test.

**Figure S7 Analysis of miRNAs in AEVs by small RNA sequence.** (A) Representative density distribution map of miRNAs in different AEVs. Light orange indicates AEVs-Ctrl, light green indicates AEVs-A $\beta$  and light gray indicates AEVs-A $\beta$ +H. (B-D) Volcanic maps exhibit statistically differentially expressed miRNAs between the AEVs-Ctrl and AEVs-A $\beta$  (B), AEVs-A $\beta$  and AEVs-A $\beta$ +H (C), AEVs-Ctrl and AEVs-A $\beta$ +H (D). The red and green dots indicate miRNAs that are up-regulated and down-regulated respectively, and the gray dots indicate miRNAs that are no statistical differences.

**Figure S8 Supplementary data for A $\beta$  brain injection mice treated with miR-206-3p antagomir in Y-maze and MWM test.** (A) Representative the movement distance of escape latency for A $\beta$  brain injection mice treated with miR-206-3p antagomir in MWM test,  $n = 9-12$ . In Y-maze test, total arm entries (B), total traveled distance (C), the correlation between total arm entries and spontaneous alternation (D), the correlation between total traveled distance and spontaneous alternation (E) in A $\beta$  brain injection mice treated with miR-206-3p antagomir,  $n = 9-12$ . Data are mean  $\pm$  SEM.  $*p < 0.05$ .  $P$  values are calculated by one-way ANOVA with Tukey's post-hoc test and two-way ANOVA with Tukey's post-hoc test.

**Figure S9 AEVs-A $\beta$ +H increases BDNF levels and inhibits the AEP activity in the brain of AD mice.** (A-C) BDNF expression in PFC and hippocampus of AD mice with A $\beta_{1-42}$  brain injection,  $n = 9-11$ . (D-E) BDNF level in the PFC and hippocampal tissues detected by Elisa,  $n = 4$ . (F) Representative immunoblotting images of AEP (full-length and cleaved AEP) in the PFC and hippocampus. (G-H) The quantified expression of AEP,  $n = 7-8$ . Data are mean  $\pm$  SEM.  $*p < 0.05$ ,  $**p < 0.01$ ,  $***p < 0.001$ .

0.001. *P* values are calculated by one-way ANOVA with Tukey's post-hoc test.

**Figure S10 No direct target relationship between miR-206-3p and the synaptic proteins (PSD95, GAP43 and SYN).** Dual-luciferase reporter assay has showed that miR-206-3p does not directly bind to the 3'UTR of PSD95 (A), GAP43 (B) and SYN (C). Data are mean  $\pm$  SEM. *n* = 3. *P* values are calculated by one-way ANOVA with Tukey's post-hoc test (n.s.: not significant).

**Figure S11 AEVs- $A\beta$ +H and miR-206-3p antagomir have no effects on the expression of APP cleaving enzymes (ADAM10, BACE1) and  $A\beta$  clearance proteins (IDE).** Representative the immunoblots (A) and quantified expression of ADAM10, BACE1 and IDE in PFC (B-D) and hippocampus (E-H) of APP/PS1 mice with intranasal administration of AEVs, *n* = 5-6. (I-O) The expression of ADAM10, BACE1 and IDE in the PFC (I, J-L) and hippocampus (I, M-O) of  $A\beta$  brain injection mice with intranasal administration of AEVs, *n* = 5-6. The representative immunoblots (P) and quantified expression of ADAM10, BACE1, and IDE in the PFC (Q-S) and hippocampus (T-V) of AD mice injected with miR-206-3p antagomir, *n* = 9. Data are mean  $\pm$  SEM. \**p* < 0.05 and \*\**p* < 0.01. *P* values are calculated by one-way ANOVA with Tukey's post-hoc test.

**Figure S12 The correlation between plasma miR-206-3p or BDNF and gender in the whole cohort.** The correlation between plasma miR-206-3p and gender in the healthy individuals (A, Ctrl), AD patients (B), PD patients (C) and Schizophrenia patients (D), *n* = 25, 18, 15 and 12 for normal control and patients with AD, PD and Schizophrenia respectively. The correlation between plasma BDNF and gender in the healthy individuals (E, Ctrl), AD patients (F), PD patients (G) and Schizophrenia patients (H), *n* = 16, 18, 13 and 8 for normal control and patients with AD, PD and Schizophrenia respectively. Data are calculated by Pearson correlations and best

fitted with linear regression curve.

**Figure S1**

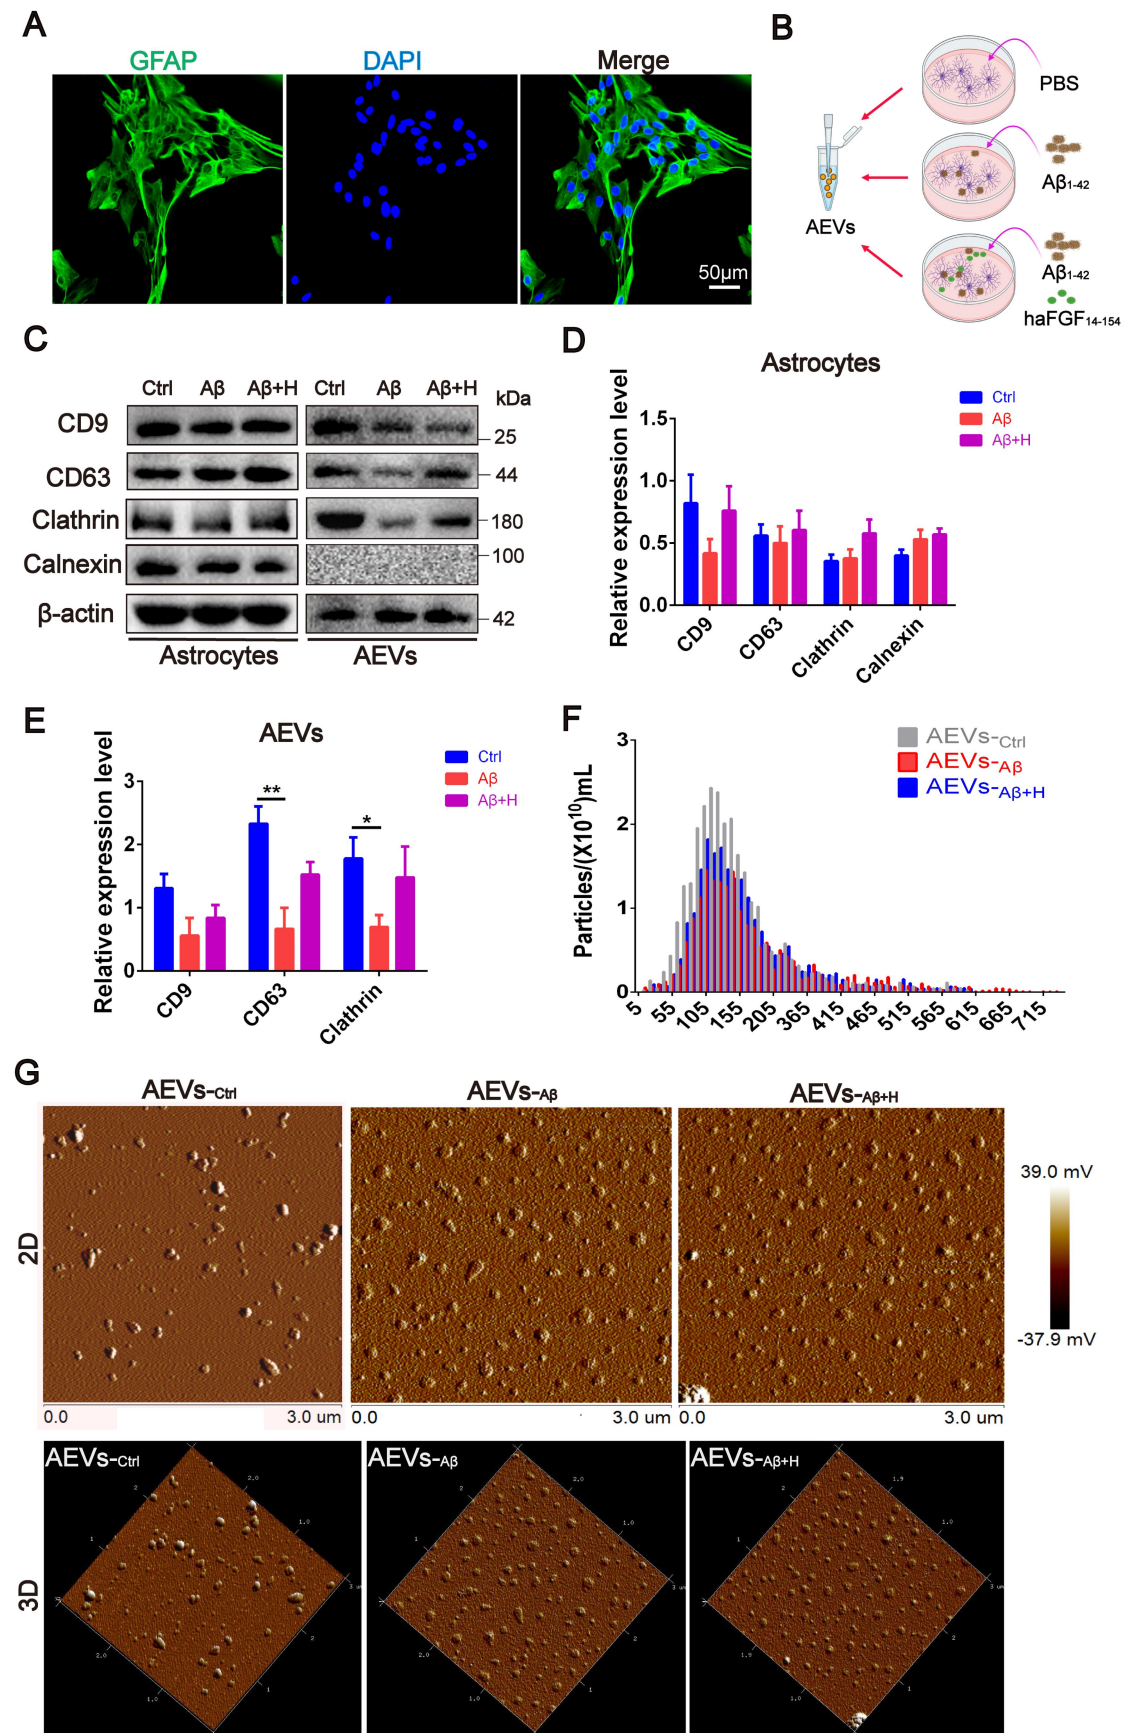

**Figure S2**

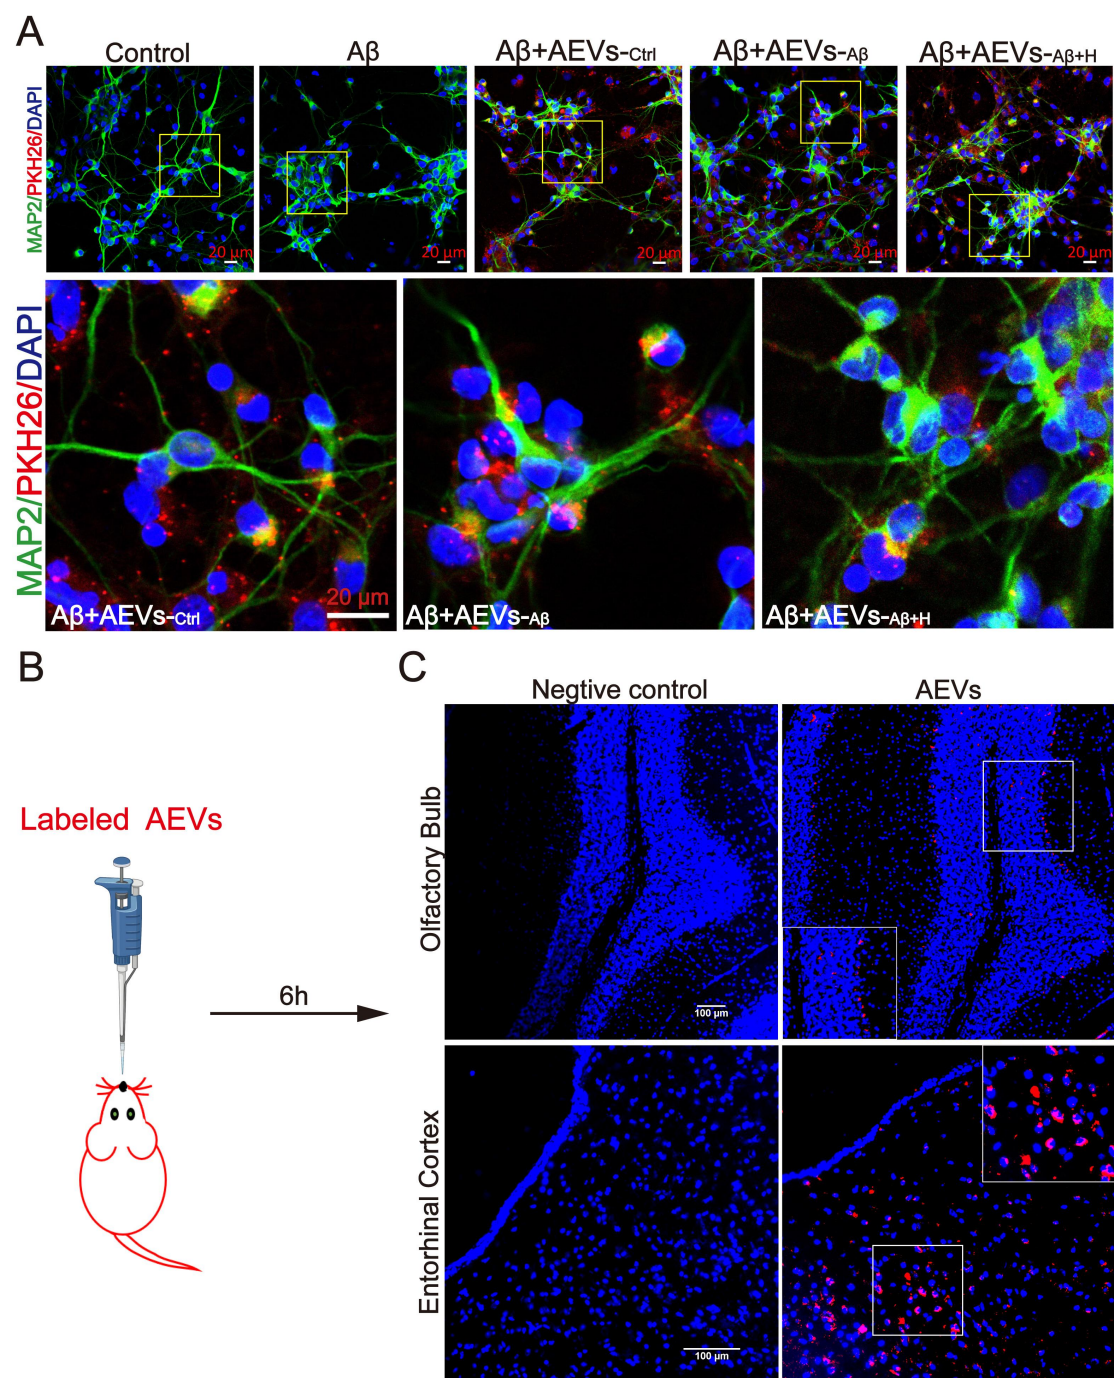

Figure S3

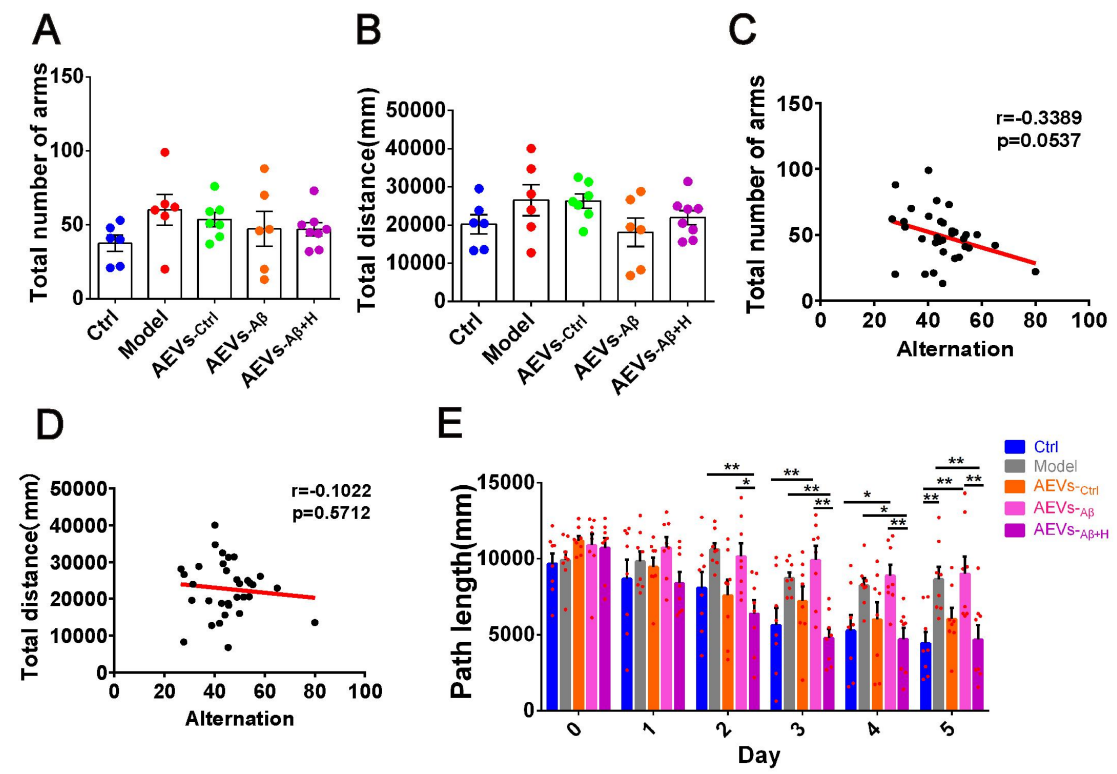

**Figure S4**

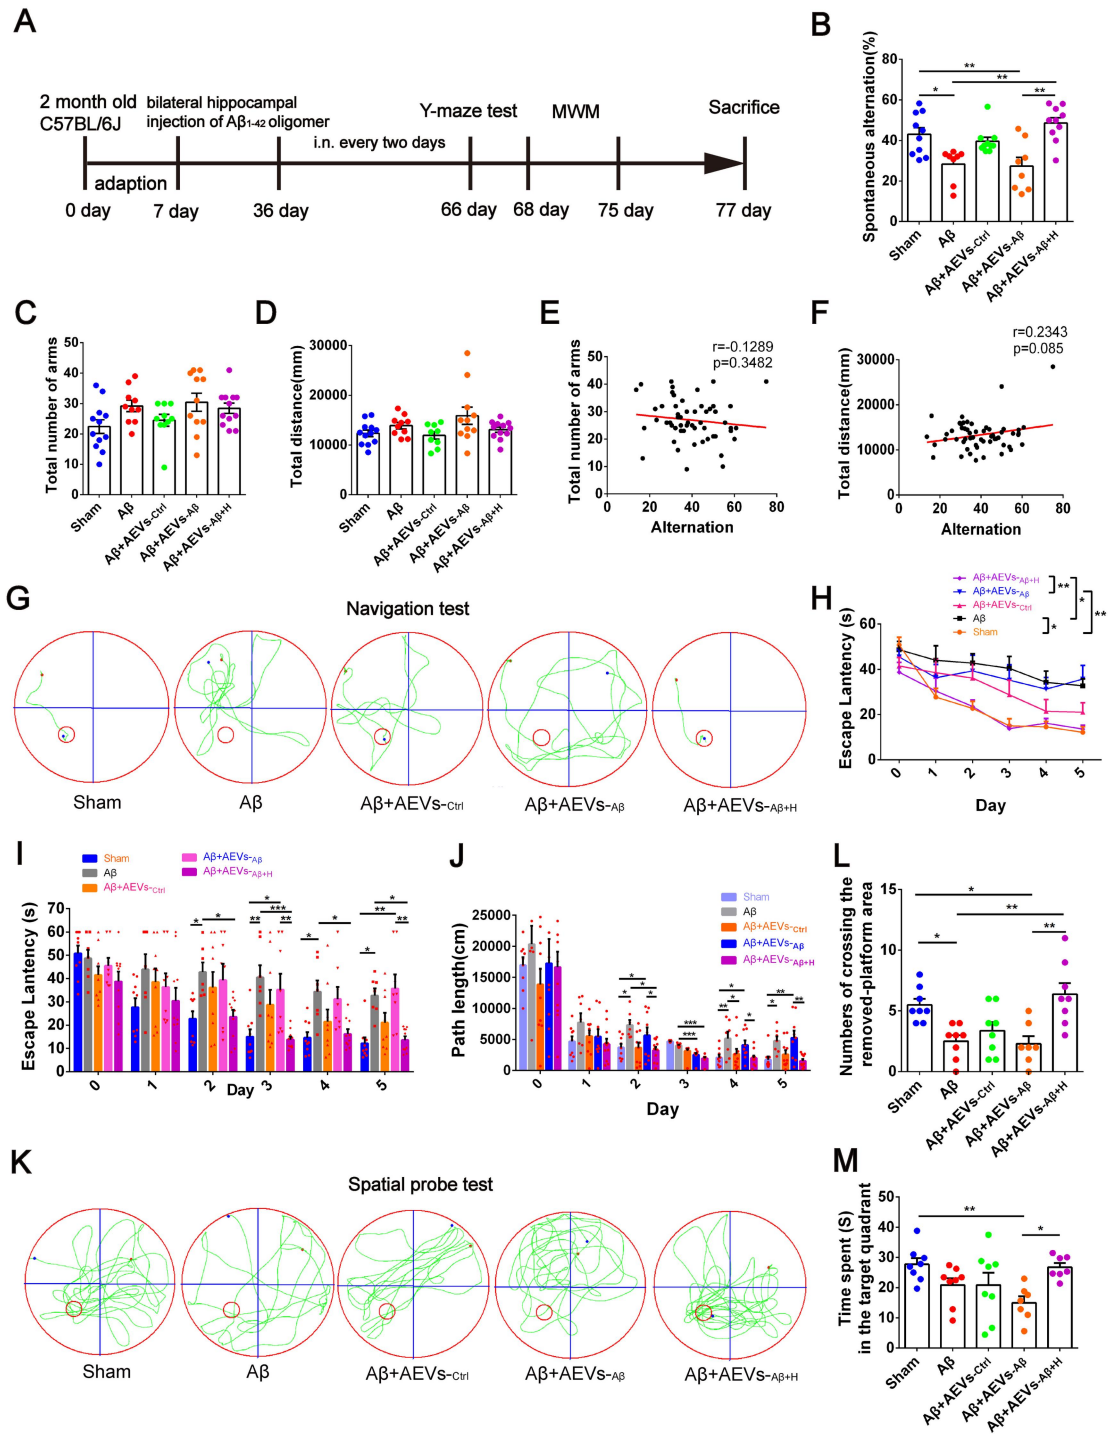

Figure S5

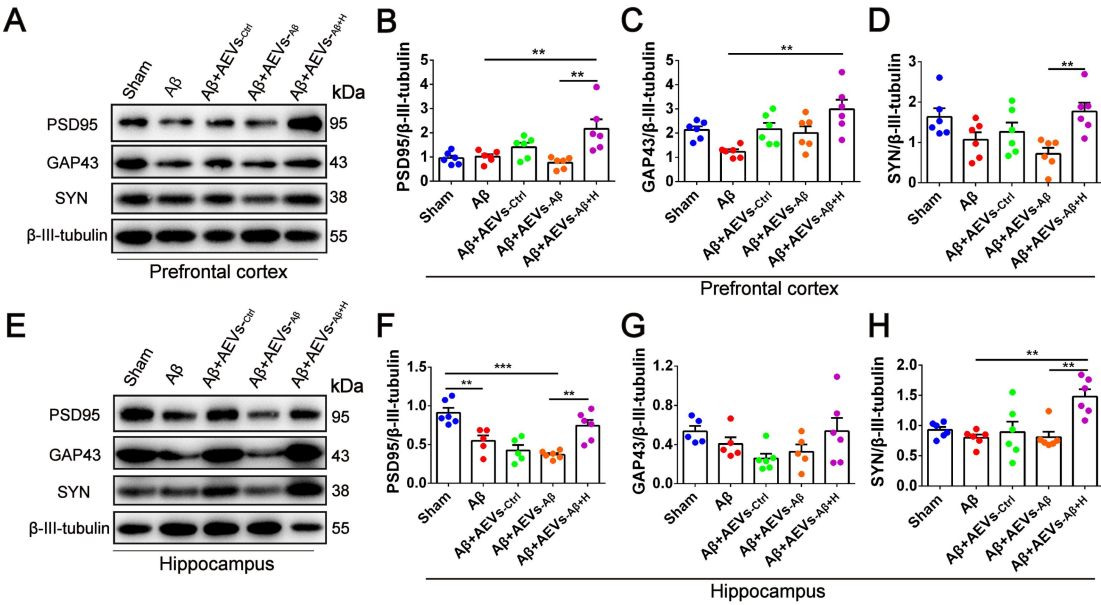

**Figure S6**

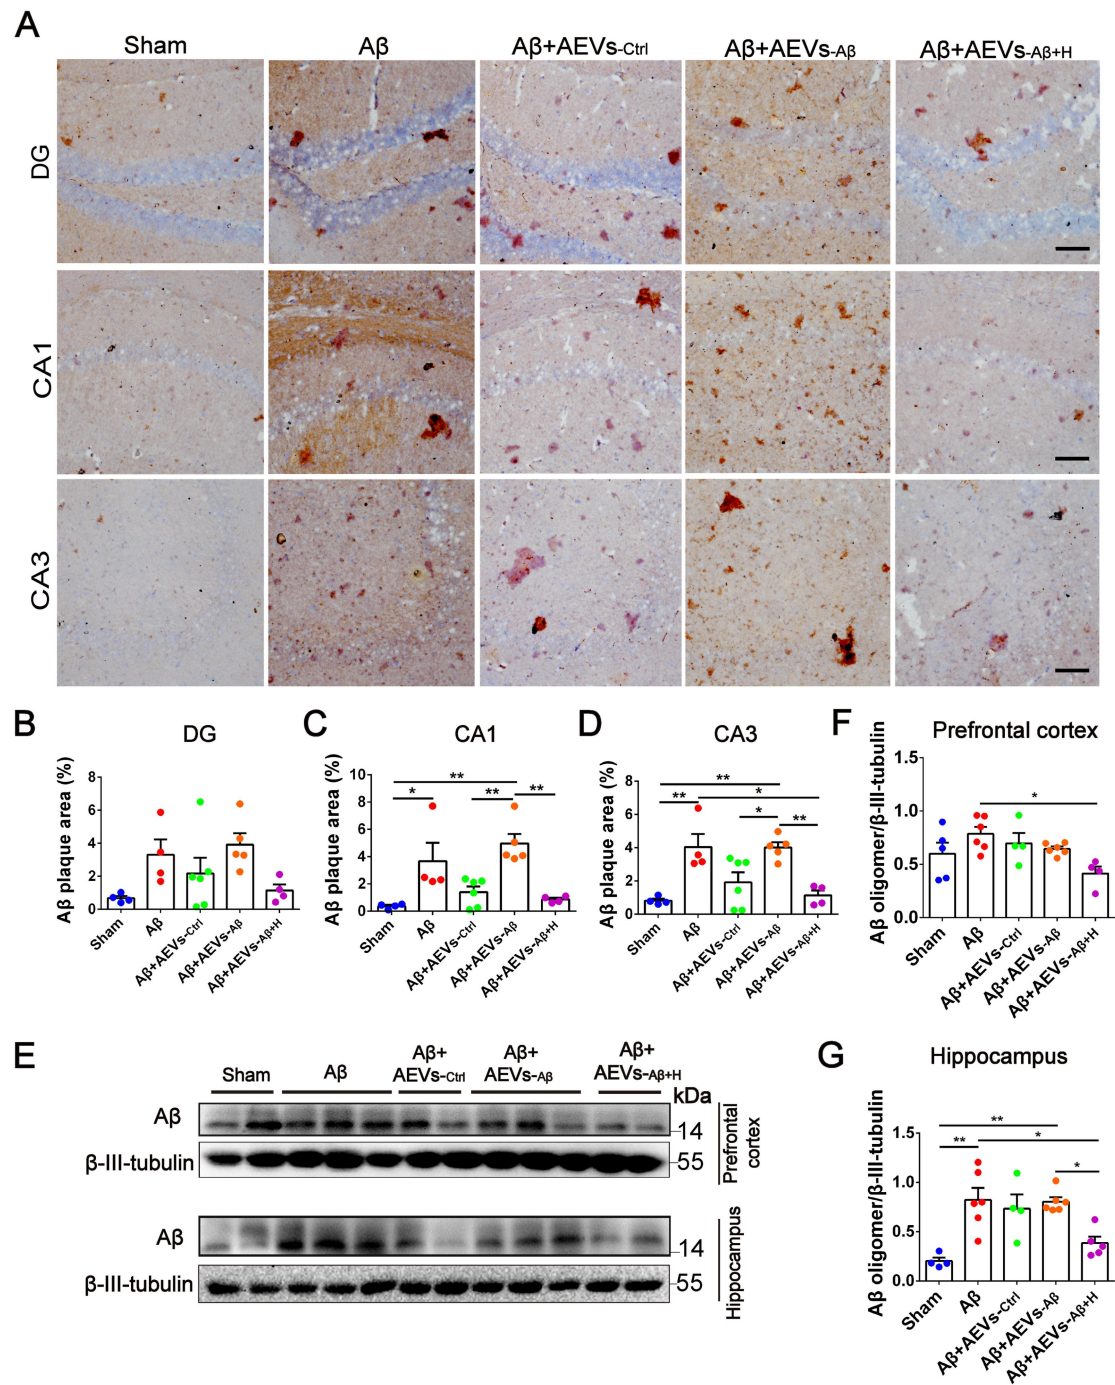

Figure S7

A

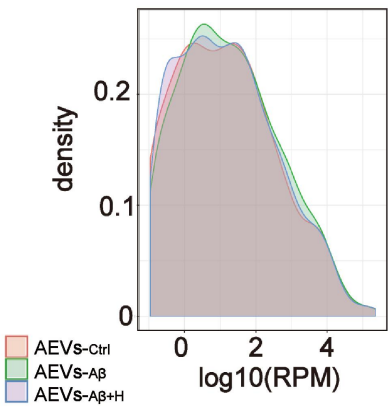

B

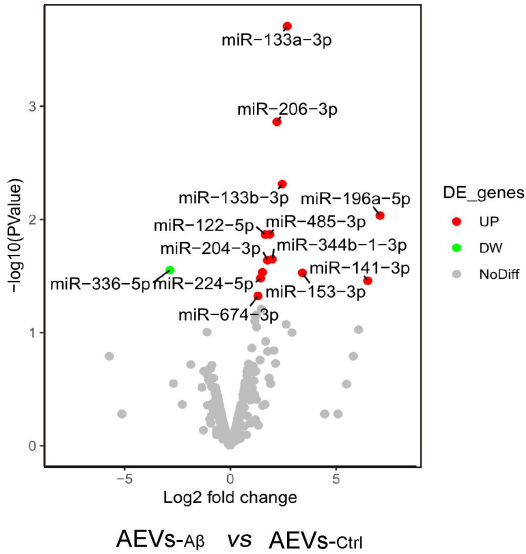

C

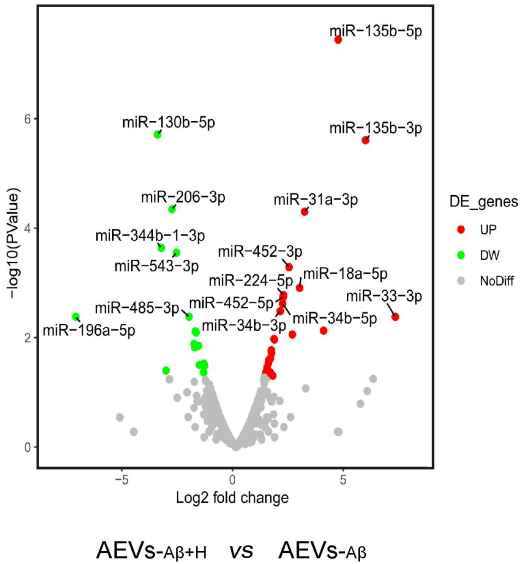

D

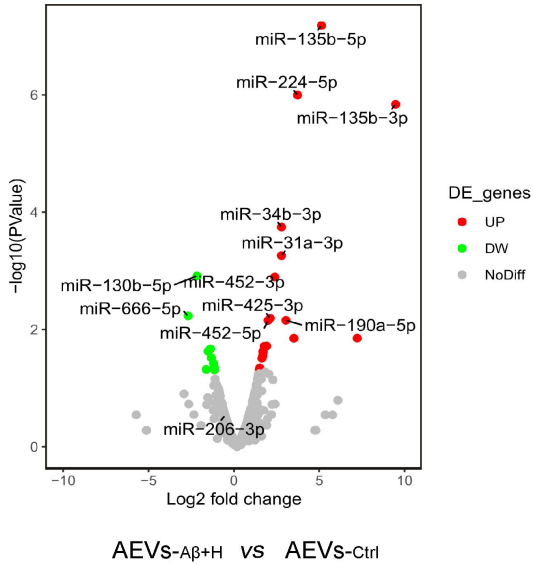

**Figure S8**

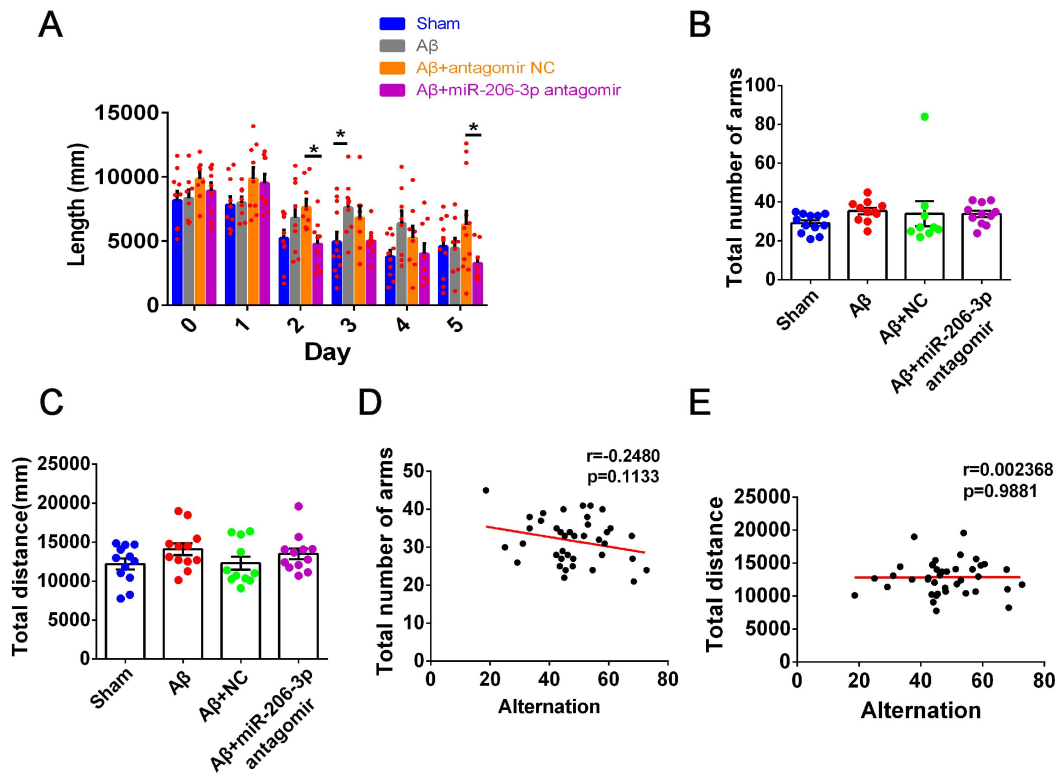

Figure S9

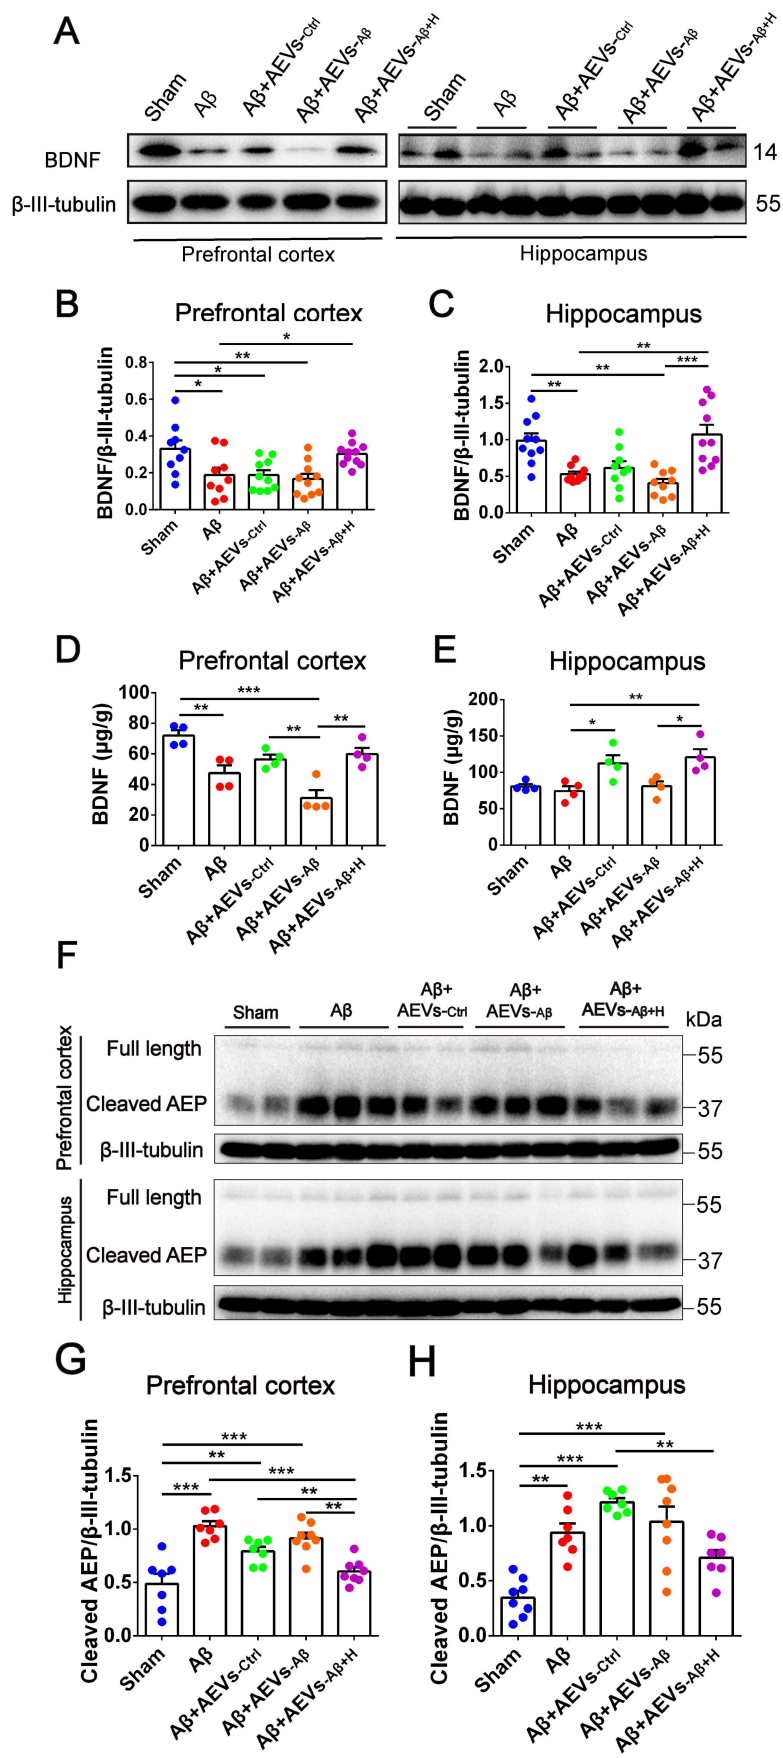

Figure S10

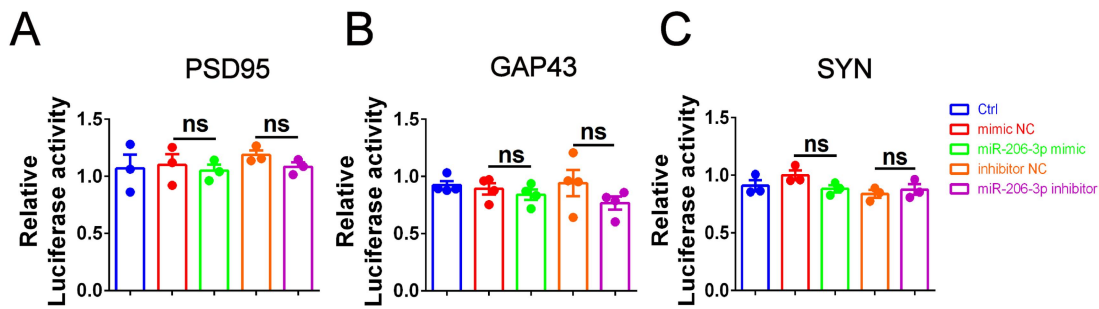

Figure S11

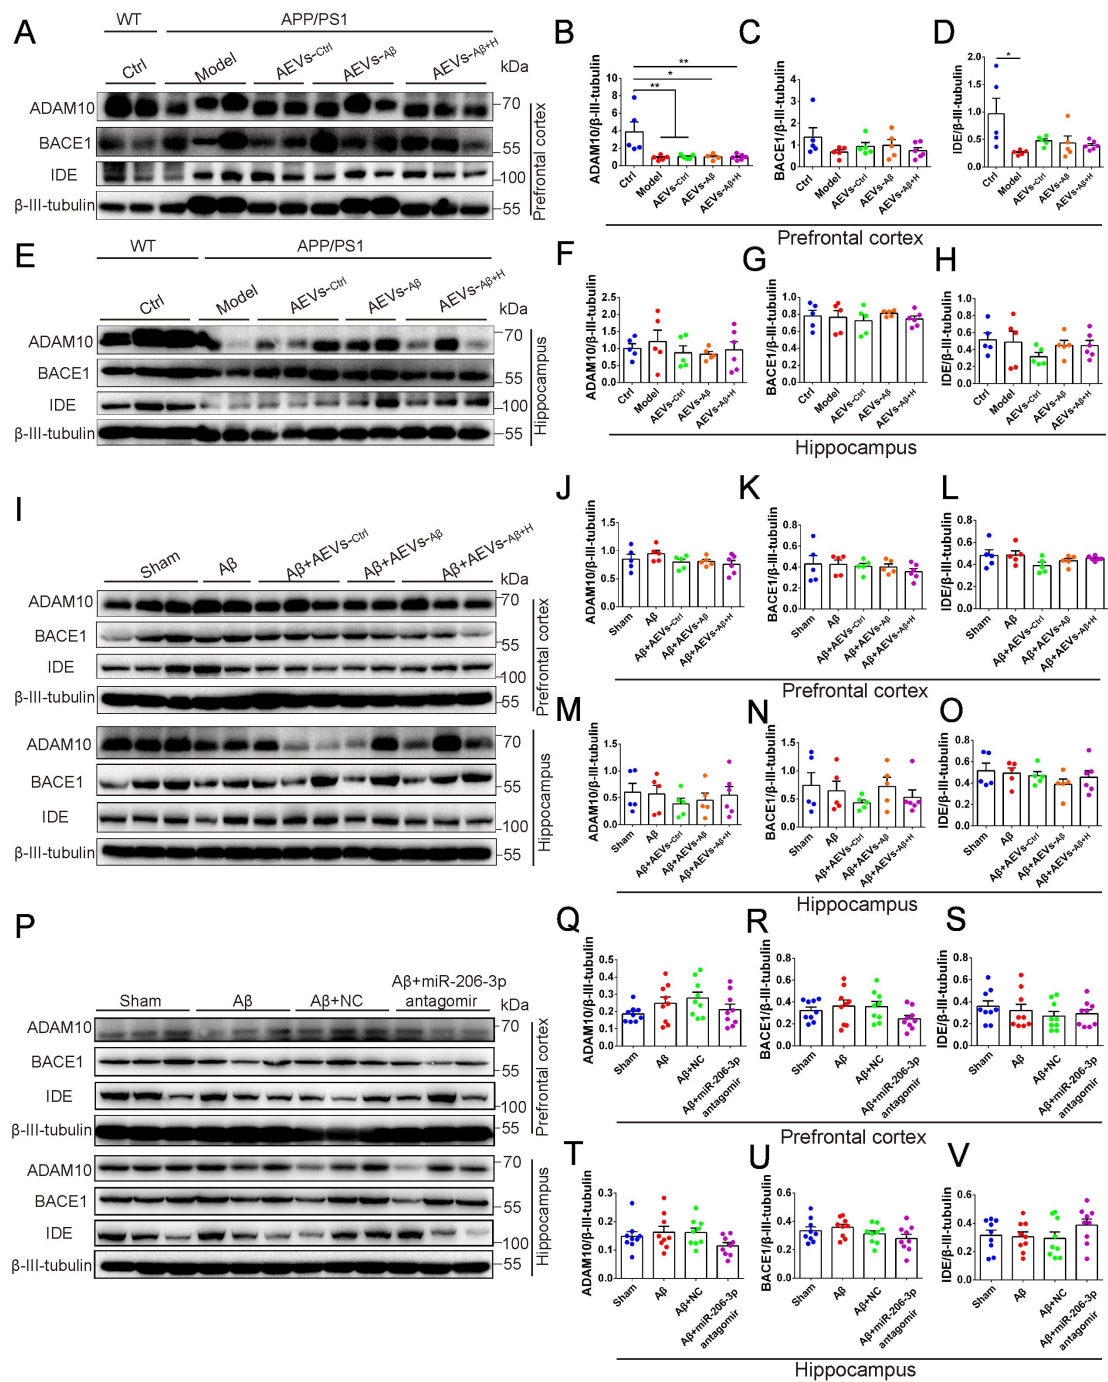

**Figure S12**

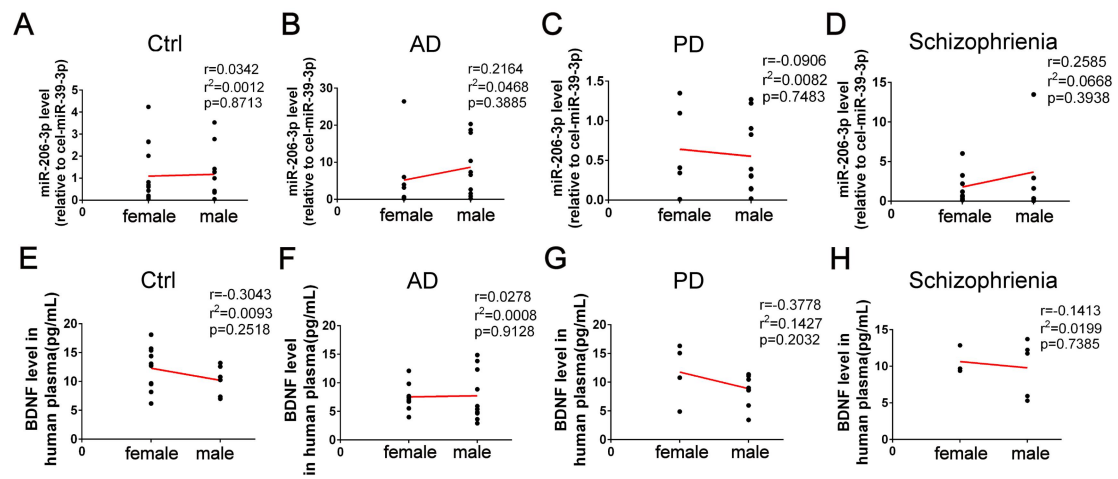

Supplement: Supplementary file 1 — Supplementary figures. [file thnov12p3862s1.pdf]
